# Supplementary material for: Sensitized monolayer MoS2 phototransistors with ultrahigh responsivity
Source: Royal Society of Chemistry journal article supplement (doi:10.1039/c7tc03476h), 2017-01-01
Supplement: c7tc03476h1.pdf [file c7tc03476h1.pdf]

## Sensitized monolayer MoS<sub>2</sub> phototransistors with ultrahigh responsivity

Received 00th January 20xx,  
Accepted 00th January 20xx

Yujue Yang,<sup>a</sup> Nengjie Huo<sup>a</sup> and Jingbo Li<sup>\*a,b</sup>

DOI: 10.1039/x0xx00000x

www.rsc.org/

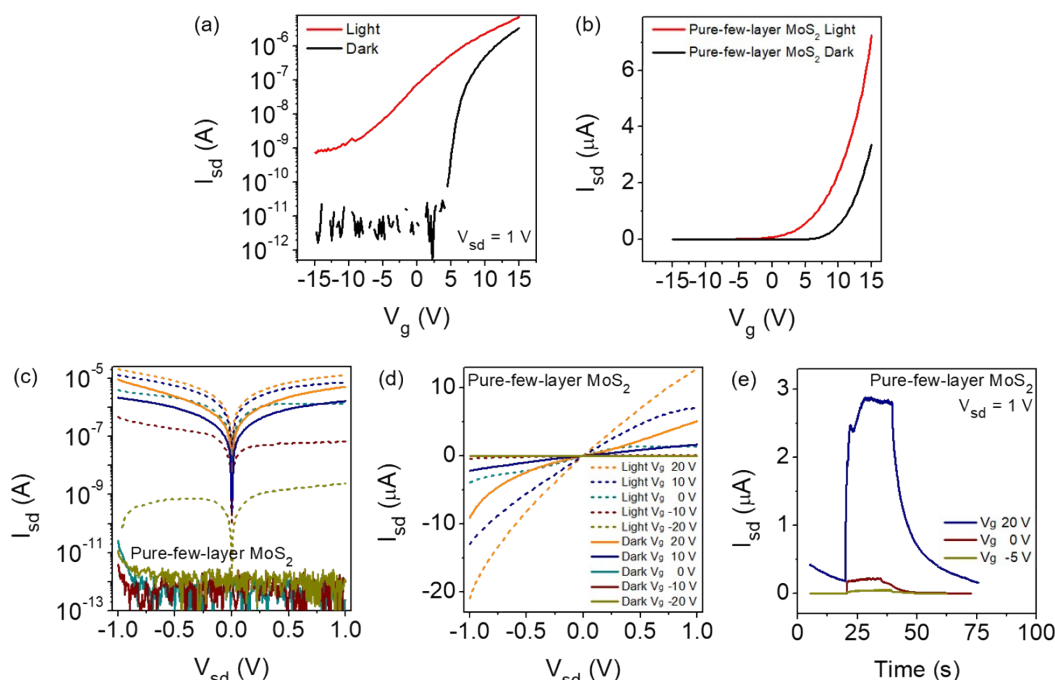

**Fig. S1** (a) Transfer characteristics ( $I_{sd}$ - $V_g$ ) of the pure-few-layer MoS<sub>2</sub> based phototransistors under dark and light illumination in log scale. (b) The corresponding transfer curves in linear scale of y-axis. (c, d) Output characteristics  $I_{sd}$ - $V_{sd}$  of few-layer MoS<sub>2</sub> device in dark and light illumination states in log and linear scale of y-axis, respectively. (e) Temporal response of the pure-few-layer MoS<sub>2</sub> at different back gate and a bias voltage  $V_{sd}$  of 1 V.

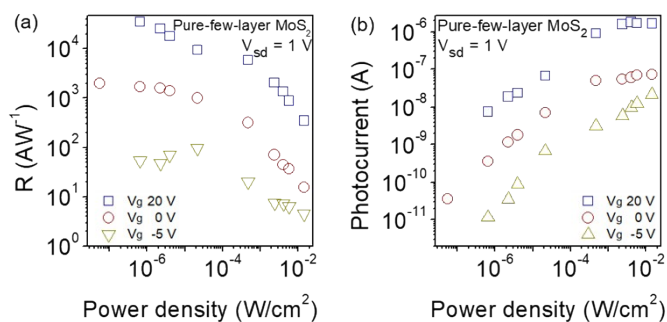

**Fig. S2** (a) Responsivity and (b) photocurrent of pure-few-layer MoS<sub>2</sub> phototransistors at different back gate voltage and a bias voltage  $V_{sd}$  of 1 V as a function of light power density, respectively. Compared with the sensitized-MoS<sub>2</sub>, the pure-few-layer MoS<sub>2</sub> device also exhibits a smaller responsivity and photocurrent at  $V_{sd} = 1$  V.

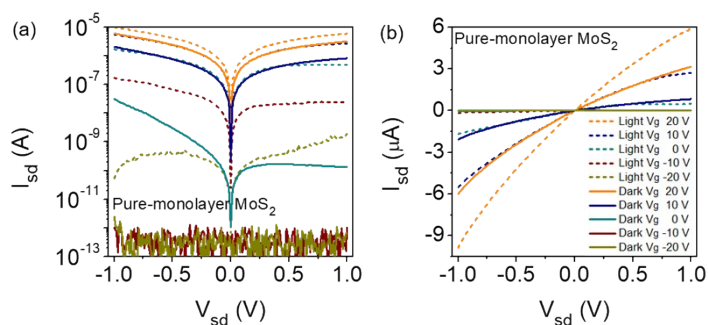

**Fig. S3** (a) The output curves ( $I_{sd}$ - $V_{sd}$ ) of pure-monolayer MoS<sub>2</sub> device under dark and 14.4 mW/cm<sup>2</sup> illumination intensities for different back gate  $V_g$  in log scale. (b) Corresponding output curves with linear scale of y-axis. It can be observed that the drain current under both dark and illumination is also much smaller than that in sensitized-MoS<sub>2</sub> device.
